# Supplementary material for: The conjugation of indolicidin to polyethylenimine for enhanced gene delivery with reduced cytotoxicity
Source: Royal Society of Chemistry journal article supplement (doi:10.1039/c8tb01408f), 2018-01-01
Supplement: c8tb01408f1.pdf [file c8tb01408f1.pdf]

**Figure S1**

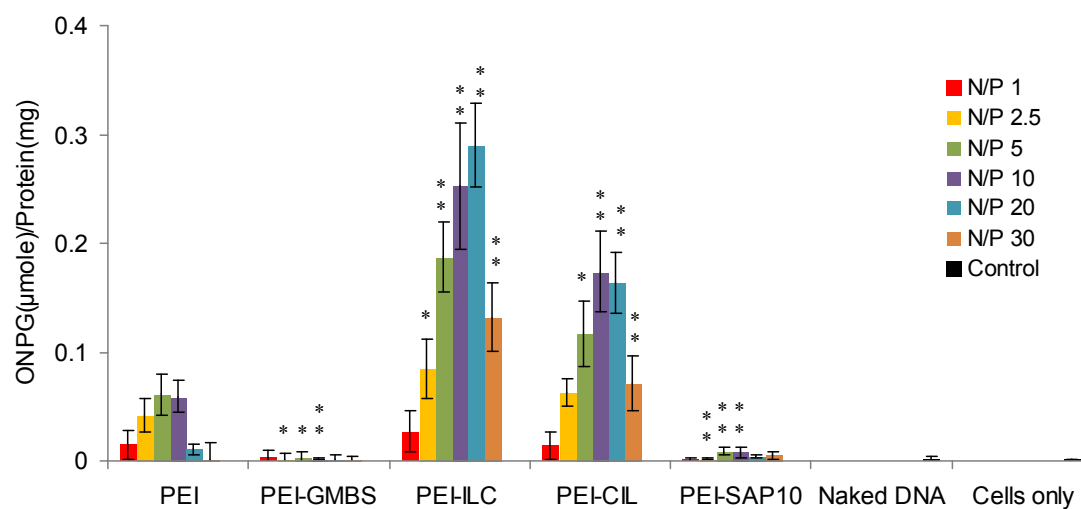

**Figure S1** The effect of FBS on *in vitro* transfection efficiency

Plasmid DNA encoding *LacZ* was complexed with PEI or conjugates in DMEM containing 10 % FBS to evaluate their transfection efficiencies in the presence of serum. (t test compared the results to those of PEI at the same N/P ratios. \*:  $p < 0.05$ ; \*\*:  $p < 0.01$ )
